# Supplementary material for: Inactivation of antibiotic-resistant bacteria and antibiotic-resistance genes in wastewater streams: Current challenges and future perspectives
Source: PubMed Central journal article supplement (PMC9888414; doi:10.3389/fmicb.2022.1100102), 2023-01-16
Supplement: Data_Sheet_1.pdf [file Data_Sheet_1.pdf]

# Supplementary Material

## Inactivation of antibiotic-resistant bacteria and antibiotic-resistance genes in wastewater streams: Current challenges and future perspectives

Thabang B. M. Mosaka<sup>1</sup>, John O. Unuofin<sup>1</sup>, Michael O. Daramola<sup>1</sup>, Chedly Tizaoui<sup>2</sup> Samuel A. Iwarere<sup>1\*</sup>

<sup>1</sup>Department of Chemical Engineering, Faculty of Engineering, Built Environment and Information Technology, University of Pretoria, Hatfield, Pretoria 0002, South Africa

<sup>2</sup>Water and Resources Recovery Research Lab, Department of Chemical Engineering, Faculty of Science and Engineering, Swansea University, Swansea SA1 8EN, United Kingdom

Corresponding author: [samuel.iwarere@up.ac.za](mailto:samuel.iwarere@up.ac.za)

Figure S1 is the flow diagram following the Preferred Reporting Items for Systematic Reviews and Meta-Analyses (PRISMA) approach used for this systematic review and compilation of removal efficiencies of antibiotic - resistant bacteria and antibiotic-resistance genes reported in actual wastewater treatment plants.

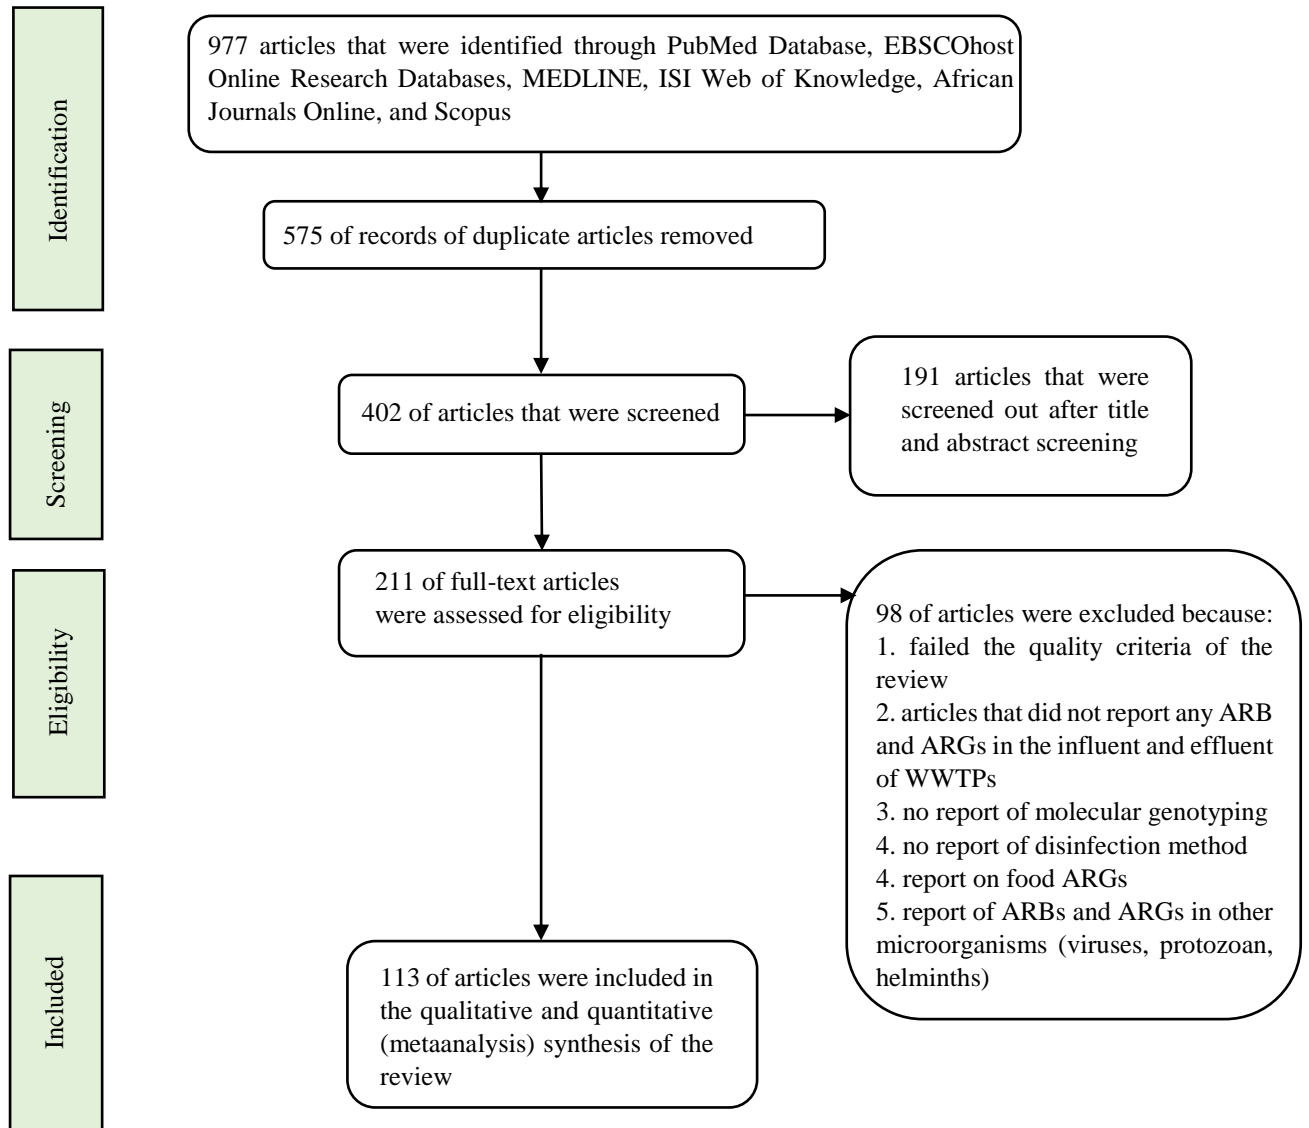

Figure 1: Flow diagram summarizing the process of literature search and selection.
